# Supplementary material for: Discrepancy Between Fasting Flow-Mediated Dilation and Parameter of Lipids in Blood: A Randomized Exploratory Study of the Effect of Omega-3 Fatty Acid Ethyl Esters on Vascular Endothelial Function in Patients With Hyperlipidemia
Source: Springer Nature journal article supplement (doi:10.1007/s12325-020-01286-1), 2020-03-21
Supplement: MOESM2 [file 17820800]

Table S5 ii. Spearman's rank correlation coefficient between change from week 0 on %FMD (fasting) and change from week 0 c

|                                         | 2 g group<br>N = 18        | 4 g group<br>N = 19        |
|-----------------------------------------|----------------------------|----------------------------|
| Spearman's Rank Correlation Coefficient | %FMD (fasting)<br>(week 8) | %FMD (fasting)<br>(week 8) |
| Panel of lipids (fasting) (8 week)      |                            |                            |
| Acylcarnitine(C10:0)                    | 0.369                      | 0.613                      |
| Acylcarnitine(C12:0)                    | 0.377                      | 0.556                      |
| Acylcarnitine(C12:1)                    | 0.451                      | 0.418                      |
| Acylcarnitine(C13:0)                    | 0.560                      | 0.441                      |
| Acylcarnitine(C13:1)                    | 0.530                      | 0.336                      |
| Acylcarnitine(C14:0)                    | 0.449                      | 0.472                      |
| Acylcarnitine(C14:1)                    | 0.387                      | 0.391                      |
| Acylcarnitine(C14:2)                    | 0.343                      | 0.316                      |
| Acylcarnitine(C16:0)                    | 0.391                      | 0.483                      |
| Acylcarnitine(C16:1)                    | 0.376                      | 0.456                      |
| Acylcarnitine(C18:0)                    | 0.304                      | 0.347                      |
| Acylcarnitine(C18:1)                    | 0.246                      | 0.443                      |
| Acylcarnitine(C18:2)                    | 0.099                      | 0.499                      |
| CE(a-18:2)                              | -0.265                     | -0.499                     |
| CE(a-20:4)                              | -0.215                     | -0.556                     |
| CE(a-20:5)                              | 0.215                      | -0.275                     |
| CE(a-22:5)                              | -0.016                     | -0.368                     |
| CE(a-22:6)                              | 0.116                      | -0.384                     |
| Cer(24:0)                               | -0.236                     | 0.082                      |
| Cer-1P(24:0)                            | -0.077                     | 0.002                      |
| Cer-1P(24:1)                            | 0.077                      | 0.244                      |
| DG(aa-34:1)                             | 0.020                      | 0.597                      |
| DG(aa-34:2)                             | 0.004                      | 0.547                      |
| DG(aa-34:3)                             | -0.059                     | 0.447                      |
| DG(aa-35:1)                             | 0.179                      | 0.576                      |
| DG(aa-35:2)                             | 0.188                      | 0.293                      |
| DG(aa-36:0)                             | 0.022                      | 0.424                      |
| DG(aa-36:1)                             | 0.061                      | 0.617                      |
| DG(aa-36:2)                             | 0.131                      | 0.615                      |
| DG(aa-36:3)                             | 0.059                      | 0.495                      |
| DG(aa-36:4)                             | -0.029                     | 0.470                      |
| DG(aa-36:5)                             | -0.174                     | 0.487                      |
| DG(aa-38:2)                             | 0.167                      | 0.657                      |
| DG(aa-38:3)                             | 0.123                      | 0.611                      |
| DG(aa-38:4)                             | 0.181                      | 0.590                      |
| DG(aa-38:5)                             | 0.093                      | 0.550                      |
| DG(aa-38:6)                             | -0.041                     | 0.456                      |
| DG(aa-38:7)                             | -0.015                     | 0.502                      |
| DG(aa-40:5)                             | 0.190                      | 0.474                      |
| DG(aa-40:6)                             | 0.066                      | 0.570                      |
| DG(aa-40:7)                             | 0.004                      | 0.565                      |
| DG(aa-40:8)                             | -0.216                     | 0.538                      |
| DHSM(16:0)                              | 0.329                      | 0.513                      |
| DHSM(18:0)                              | 0.283                      | 0.445                      |
| DHSM(20:0)                              | 0.066                      | 0.320                      |
| DHSM(22:0)                              | 0.016                      | 0.282                      |
| DHSM(23:0)                              | 0.317                      | 0.466                      |
| FFA(C10:0)                              | 0.074                      | 0.207                      |
| FFA(C12:0)                              | 0.073                      | 0.230                      |
| FFA(C12:1)                              | 0.131                      | 0.202                      |
| FFA(C14:0)                              | -0.072                     | 0.236                      |
| FFA(C15:0)                              | -0.013                     | 0.551                      |
| FFA(C15:1)                              | 0.198                      | 0.445                      |
| FFA(C18:0)                              | -0.218                     | 0.084                      |
| FFA(C18:1)                              | 0.191                      | 0.286                      |
| FFA(C22:0)                              | -0.156                     | 0.077                      |
| FFA(C22:1)                              | 0.038                      | 0.090                      |
| FFA(C24:0)                              | -0.246                     | 0.292                      |
| FFA(C26:0)                              | 0.175                      | -0.029                     |
| GA1(16:0)                               | 0.349                      | 0.540                      |
| GA1(16:1)                               | 0.216                      | 0.537                      |
| GM3(20:0)                               | 0.100                      | 0.036                      |
| GM3(22:1)                               | 0.193                      | 0.043                      |

Table S5 ii. Spearman's rank correlation coefficient between change from week 0 on %FMD (fasting) and change from week 0 c

| Spearman's Rank Correlation Coefficient | 2 g group                  | 4 g group                  |
|-----------------------------------------|----------------------------|----------------------------|
|                                         | N = 18                     | N = 19                     |
|                                         | %FMD (fasting)<br>(week 8) | %FMD (fasting)<br>(week 8) |
| GM3(23:0)                               | 0.118                      | -0.098                     |
| GM3(23:1)                               | 0.125                      | 0.200                      |
| GM3(24:0)                               | -0.029                     | -0.098                     |
| GM3(24:1)                               | 0.095                      | -0.148                     |
| GM3(24:2)                               | 0.150                      | 0.004                      |
| Hex-Cer(24:0)                           | -0.168                     | 0.207                      |
| Hex2-Cer(24:1)                          | 0.079                      | 0.086                      |
| Hex3-Cer(16:0)                          | -0.175                     | 0.080                      |
| Hex3-Cer(24:0)                          | 0.248                      | -0.002                     |
| Hex3-Cer(24:1)                          | -0.181                     | 0.045                      |
| LPC(a-16:1)                             | 0.166                      | 0.266                      |
| LPC(a-17:1)                             | 0.537                      | 0.406                      |
| LPC(a-18:3)                             | -0.258                     | 0.155                      |
| LPC(a-20:0)                             | -0.133                     | 0.288                      |
| LPC(a-20:1)                             | 0.138                      | 0.518                      |
| LPC(a-20:4)                             | 0.122                      | 0.418                      |
| LPC(a-20:5)                             | 0.472                      | 0.433                      |
| LPC(a-22:1)                             | 0.321                      | 0.168                      |
| LPC(a-22:4)                             | 0.100                      | 0.145                      |
| LPC(a-22:5)                             | 0.168                      | 0.304                      |
| LPC(a-22:6)                             | 0.415                      | 0.820                      |
| LPC(a-24:0)                             | 0.099                      | 0.423                      |
| LPC(e-18:1)                             | 0.216                      | 0.349                      |
| LPC(e-24:0)                             | 0.183                      | 0.235                      |
| LPC(e-24:1)                             | 0.336                      | 0.431                      |
| PC(aa-30:0)                             | 0.091                      | 0.307                      |
| PC(aa-30:1)                             | 0.150                      | 0.266                      |
| PC(aa-32:0)                             | 0.261                      | 0.214                      |
| PC(aa-32:1)                             | 0.039                      | 0.116                      |
| PC(aa-32:2)                             | -0.038                     | 0.198                      |
| PC(aa-33:0)                             | 0.295                      | 0.490                      |
| PC(aa-33:2)                             | -0.104                     | 0.365                      |
| PC(aa-34:0)                             | 0.145                      | 0.055                      |
| PC(aa-34:1)                             | 0.093                      | 0.361                      |
| PC(aa-34:2)                             | -0.136                     | 0.332                      |
| PC(aa-34:3)                             | -0.116                     | 0.120                      |
| PC(aa-34:4)                             | 0.047                      | 0.370                      |
| PC(aa-34:5)                             | 0.259                      | 0.651                      |
| PC(aa-35:0)                             | 0.531                      | 0.132                      |
| PC(aa-35:1)                             | 0.424                      | 0.368                      |
| PC(aa-35:2)                             | 0.107                      | 0.220                      |
| PC(aa-35:3)                             | 0.191                      | 0.324                      |
| PC(aa-35:4)                             | -0.016                     | 0.329                      |
| PC(aa-35:5)                             | 0.401                      | 0.534                      |
| PC(aa-36:0)                             | 0.196                      | 0.071                      |
| PC(aa-36:1)                             | 0.424                      | 0.315                      |
| PC(aa-36:2)                             | 0.036                      | 0.586                      |
| PC(aa-36:3)                             | -0.127                     | 0.175                      |
| PC(aa-36:4)                             | -0.222                     | 0.406                      |
| PC(aa-36:5)                             | -0.419                     | 0.204                      |
| PC(aa-37:1)                             | 0.386                      | 0.554                      |
| PC(aa-37:2)                             | 0.147                      | 0.417                      |
| PC(aa-38:1)                             | 0.356                      | 0.245                      |
| PC(aa-38:2)                             | 0.177                      | 0.424                      |
| PC(aa-38:3)                             | 0.263                      | 0.179                      |
| PC(aa-38:4)                             | 0.420                      | 0.297                      |
| PC(aa-38:5)                             | 0.544                      | 0.338                      |
| PC(aa-38:6)                             | 0.639                      | 0.549                      |
| PC(aa-38:7)                             | 0.424                      | 0.620                      |
| PC(aa-39:4)                             | 0.508                      | 0.130                      |
| PC(aa-39:5)                             | 0.506                      | 0.152                      |
| PC(aa-39:6)                             | 0.665                      | 0.175                      |
| PC(aa-40:4)                             | 0.134                      | 0.043                      |
| PC(aa-40:6)                             | 0.472                      | 0.676                      |

Table S5 ii. Spearman's rank correlation coefficient between change from week 0 on %FMD (fasting) and change from week 0 (

|                                         | 2 g group<br>N = 18        | 4 g group<br>N = 19        |
|-----------------------------------------|----------------------------|----------------------------|
| Spearman's Rank Correlation Coefficient | %FMD (fasting)<br>(week 8) | %FMD (fasting)<br>(week 8) |
| PC(aa-40:7)                             | 0.487                      | 0.559                      |
| PC(aa-42:5)                             | 0.127                      | 0.389                      |
| PC(aa-42:8)                             | -0.297                     | 0.077                      |
| PC(aa-44:7)                             | 0.343                      | 0.365                      |
| PC(aa-44:8)                             | 0.234                      | 0.488                      |
| PC(aa-44:9)                             | 0.038                      | -0.068                     |
| PC(ae-32:0)                             | 0.229                      | 0.390                      |
| PC(ae-32:1)                             | 0.093                      | 0.368                      |
| PC(ae-34:0)                             | 0.061                      | 0.160                      |
| PC(ae-34:5)                             | -0.049                     | 0.050                      |
| PC(ae-36:1)                             | 0.129                      | 0.341                      |
| PC(ae-36:2)                             | 0.045                      | 0.188                      |
| PC(ae-36:3)                             | 0.084                      | 0.379                      |
| PC(ae-36:4)                             | 0.258                      | 0.227                      |
| PC(ae-36:5)                             | 0.387                      | 0.393                      |
| PC(ae-36:6)                             | 0.057                      | 0.138                      |
| PC(ae-38:2)                             | -0.134                     | 0.243                      |
| PC(ae-38:3)                             | -0.057                     | 0.267                      |
| PC(ae-38:4)                             | -0.048                     | 0.363                      |
| PC(ae-38:6)                             | 0.465                      | 0.624                      |
| PC(ae-40:1)                             | 0.130                      | 0.470                      |
| PC(ae-40:2)                             | 0.042                      | 0.116                      |
| PC(ae-40:5)                             | 0.258                      | 0.648                      |
| PC(ae-40:7)                             | 0.687                      | 0.477                      |
| PC(ae-42:10)                            | 0.581                      | 0.402                      |
| PC(ae-42:2)                             | 0.351                      | 0.481                      |
| PC(ae-42:4)                             | 0.063                      | 0.509                      |
| PC(ae-42:5)                             | 0.306                      | 0.695                      |
| PC(ae-42:6)                             | 0.187                      | 0.300                      |
| PC(ae-42:7)                             | 0.129                      | 0.425                      |
| PC(ae-42:8)                             | 0.079                      | 0.379                      |
| PC(ae-42:9)                             | 0.136                      | 0.064                      |
| PC(ae-44:5)                             | 0.161                      | 0.563                      |
| PC(ae-44:6)                             | 0.218                      | 0.288                      |
| PC(ae-44:7)                             | 0.254                      | 0.374                      |
| PC(ae-44:8)                             | 0.184                      | 0.329                      |
| PC(ae-44:9)                             | 0.043                      | 0.440                      |
| PE(ae-36:3)                             | -0.168                     | 0.175                      |
| PE(ae-38:4)                             | 0.056                      | 0.032                      |
| PE(ae-40:5)                             | -0.245                     | -0.107                     |
| PE(ae-40:6)                             | -0.222                     | 0.025                      |
| PE(ae-40:7)                             | -0.100                     | 0.104                      |
| PE(ae-42:6)                             | -0.243                     | -0.259                     |
| PE(ae-42:7)                             | -0.221                     | 0.013                      |
| PI(aa-38:3)                             | 0.025                      | 0.018                      |
| PI(aa-40:6)                             | 0.195                      | 0.070                      |
| PS(aa-36:1)                             | 0.098                      | 0.054                      |
| PS(aa-36:2)                             | -0.070                     | 0.161                      |
| PS(aa-38:5)                             | 0.256                      | 0.102                      |
| PS(aa-40:4)                             | 0.000                      | 0.029                      |
| PS(aa-40:5)                             | 0.020                      | 0.104                      |
| Phytocer(24:0)                          | -0.195                     | 0.261                      |
| Phytocer(25:0)                          | -0.219                     | 0.154                      |
| Phytocer(26:0)                          | 0.246                      | 0.032                      |
| SM(13:0)                                | 0.445                      | 0.797                      |
| SM(14:0)                                | 0.220                      | 0.558                      |
| SM(14:0-OH)                             | 0.356                      | 0.485                      |
| SM(14:1)                                | 0.367                      | 0.742                      |
| SM(15:0)                                | 0.274                      | 0.695                      |
| SM(15:1)                                | 0.270                      | 0.739                      |
| SM(16:0)                                | -0.029                     | 0.427                      |
| SM(16:0-OH)                             | 0.444                      | 0.290                      |
| SM(17:0)                                | 0.302                      | 0.518                      |
| SM(18:0)                                | 0.478                      | 0.681                      |

Table S5 ii. Spearman's rank correlation coefficient between change from week 0 on %FMD (fasting) and change from week 0 c

|                                         | 2 g group<br>N = 18        | 4 g group<br>N = 19        |
|-----------------------------------------|----------------------------|----------------------------|
| Spearman's Rank Correlation Coefficient | %FMD (fasting)<br>(week 8) | %FMD (fasting)<br>(week 8) |
| SM(18:1)                                | 0.524                      | 0.702                      |
| SM(19:0)                                | 0.279                      | 0.488                      |
| SM(19:1)                                | 0.256                      | 0.191                      |
| SM(20:0)                                | -0.047                     | 0.631                      |
| SM(20:1)                                | 0.216                      | 0.624                      |
| SM(20:2)                                | 0.306                      | 0.390                      |
| SM(21:0)                                | 0.059                      | 0.581                      |
| SM(21:1)                                | 0.168                      | 0.668                      |
| SM(22:0)                                | -0.050                     | 0.334                      |
| SM(22:1)                                | 0.191                      | 0.468                      |
| SM(22:2)                                | 0.374                      | 0.609                      |
| SM(23:0)                                | 0.184                      | 0.572                      |
| SM(23:1)                                | 0.322                      | 0.668                      |
| SM(23:2)                                | 0.546                      | 0.638                      |
| SM(24:0)                                | 0.064                      | 0.416                      |
| SM(24:0-OH)                             | 0.437                      | 0.195                      |
| SM(24:1)                                | 0.317                      | 0.677                      |
| SM(24:1-OH)                             | 0.586                      | 0.617                      |
| SM(24:2)                                | 0.363                      | 0.622                      |
| SM(24:3)                                | 0.503                      | 0.431                      |
| SM(25:0)                                | 0.102                      | 0.472                      |
| SM(25:1)                                | 0.240                      | 0.549                      |
| SM(25:2)                                | 0.157                      | 0.497                      |
| SM(26:0)                                | -0.015                     | 0.295                      |
| SM(26:1)                                | 0.356                      | 0.581                      |
| TG(aaa-49:1)                            | 0.140                      | 0.277                      |
| TG(aaa-49:2)                            | 0.113                      | 0.213                      |
| TG(aaa-54:0)                            | -0.327                     | -0.038                     |
| TG(aaa-56:0)                            | -0.060                     | -0.369                     |

Table S5 iii. Spearman's rank correlation coefficient between percent change from week 0 on %FMD (fasting) and percent change fr

|                                         | 2 g group<br>N = 18        | 4 g group<br>N = 19        |
|-----------------------------------------|----------------------------|----------------------------|
| Spearman's Rank Correlation Coefficient | %FMD (fasting)<br>(week 8) | %FMD (fasting)<br>(week 8) |
| Panel of lipids (fasting) (8 week)      |                            |                            |
| Acylcarnitine(C10:0)                    | 0.418                      | 0.657                      |
| Acylcarnitine(C12:0)                    | 0.482                      | 0.575                      |
| Acylcarnitine(C12:1)                    | 0.575                      | 0.539                      |
| Acylcarnitine(C13:0)                    | 0.564                      | 0.425                      |
| Acylcarnitine(C13:1)                    | 0.368                      | 0.440                      |
| Acylcarnitine(C14:0)                    | 0.529                      | 0.518                      |
| Acylcarnitine(C14:1)                    | 0.400                      | 0.554                      |
| Acylcarnitine(C14:2)                    | 0.329                      | 0.493                      |
| Acylcarnitine(C16:0)                    | 0.461                      | 0.446                      |
| Acylcarnitine(C16:1)                    | 0.463                      | 0.539                      |
| Acylcarnitine(C18:0)                    | 0.396                      | 0.366                      |
| Acylcarnitine(C18:1)                    | 0.357                      | 0.607                      |
| Acylcarnitine(C18:2)                    | 0.307                      | 0.621                      |
| CE(a-18:2)                              | -0.229                     | -0.407                     |
| CE(a-20:4)                              | -0.143                     | -0.507                     |
| CE(a-20:5)                              | 0.286                      | -0.336                     |
| CE(a-22:5)                              | -0.264                     | -0.271                     |
| CE(a-22:6)                              | -0.014                     | -0.346                     |
| Cer(24:0)                               | -0.136                     | -0.061                     |
| Cer-1P(24:0)                            | -0.130                     | -0.111                     |
| Cer-1P(24:1)                            | 0.218                      | 0.139                      |
| DG(aa-34:1)                             | 0.082                      | 0.400                      |
| DG(aa-34:2)                             | 0.089                      | 0.286                      |
| DG(aa-34:3)                             | -0.036                     | 0.307                      |
| DG(aa-35:1)                             | 0.289                      | 0.411                      |
| DG(aa-35:2)                             | 0.293                      | 0.239                      |
| DG(aa-36:0)                             | 0.164                      | 0.275                      |
| DG(aa-36:1)                             | 0.229                      | 0.511                      |
| DG(aa-36:2)                             | 0.157                      | 0.471                      |
| DG(aa-36:3)                             | 0.061                      | 0.371                      |
| DG(aa-36:4)                             | -0.032                     | 0.418                      |
| DG(aa-36:5)                             | -0.139                     | 0.339                      |
| DG(aa-38:2)                             | 0.293                      | 0.571                      |
| DG(aa-38:3)                             | 0.154                      | 0.432                      |
| DG(aa-38:4)                             | 0.225                      | 0.404                      |
| DG(aa-38:5)                             | 0.111                      | 0.296                      |
| DG(aa-38:6)                             | 0.086                      | 0.439                      |
| DG(aa-38:7)                             | 0.118                      | 0.346                      |
| DG(aa-40:5)                             | 0.279                      | 0.263                      |
| DG(aa-40:6)                             | 0.189                      | 0.414                      |
| DG(aa-40:7)                             | 0.150                      | 0.407                      |
| DG(aa-40:8)                             | 0.021                      | 0.229                      |
| DHSM(16:0)                              | 0.282                      | 0.461                      |
| DHSM(18:0)                              | 0.300                      | 0.511                      |
| DHSM(20:0)                              | 0.100                      | 0.314                      |
| DHSM(22:0)                              | 0.064                      | 0.221                      |
| DHSM(23:0)                              | 0.364                      | 0.436                      |
| FFA(C10:0)                              | 0.143                      | 0.127                      |
| FFA(C12:0)                              | 0.161                      | 0.136                      |
| FFA(C12:1)                              | 0.173                      | 0.182                      |
| FFA(C14:0)                              | 0.029                      | 0.079                      |
| FFA(C15:0)                              | 0.025                      | 0.371                      |
| FFA(C15:1)                              | 0.216                      | 0.247                      |
| FFA(C18:0)                              | -0.261                     | -0.150                     |
| FFA(C18:1)                              | 0.364                      | 0.143                      |
| FFA(C22:0)                              | -0.207                     | 0.000                      |
| FFA(C22:1)                              | 0.071                      | 0.036                      |
| FFA(C24:0)                              | -0.139                     | 0.250                      |
| FFA(C26:0)                              | -0.011                     | 0.043                      |
| GA1(16:0)                               | 0.436                      | 0.582                      |
| GA1(16:1)                               | 0.304                      | 0.536                      |
| GM3(20:0)                               | 0.014                      | -0.057                     |
| GM3(22:1)                               | 0.143                      | -0.107                     |

Table S5 iii. Spearman's rank correlation coefficient between percent change from week 0 on %FMD (fasting) and percent change fr

| Spearman's Rank Correlation Coefficient | 2 g group                  | 4 g group                  |
|-----------------------------------------|----------------------------|----------------------------|
|                                         | N = 18                     | N = 19                     |
|                                         | %FMD (fasting)<br>(week 8) | %FMD (fasting)<br>(week 8) |
| GM3(23:0)                               | 0.039                      | -0.179                     |
| GM3(23:1)                               | -0.138                     | 0.218                      |
| GM3(24:0)                               | -0.043                     | -0.221                     |
| GM3(24:1)                               | 0.050                      | -0.204                     |
| GM3(24:2)                               | 0.243                      | 0.014                      |
| Hex-Cer(24:0)                           | -0.014                     | 0.011                      |
| Hex2-Cer(24:1)                          | 0.209                      | 0.054                      |
| Hex3-Cer(16:0)                          | -0.050                     | -0.061                     |
| Hex3-Cer(24:0)                          | 0.035                      | 0.200                      |
| Hex3-Cer(24:1)                          | -0.244                     | 0.114                      |
| LPC(a-16:1)                             | 0.304                      | 0.404                      |
| LPC(a-17:1)                             | 0.611                      | 0.411                      |
| LPC(a-18:3)                             | -0.136                     | 0.314                      |
| LPC(a-20:0)                             | 0.000                      | 0.300                      |
| LPC(a-20:1)                             | 0.375                      | 0.564                      |
| LPC(a-20:4)                             | 0.232                      | 0.425                      |
| LPC(a-20:5)                             | 0.543                      | 0.521                      |
| LPC(a-22:1)                             | 0.367                      | 0.161                      |
| LPC(a-22:4)                             | 0.177                      | 0.118                      |
| LPC(a-22:5)                             | 0.232                      | 0.254                      |
| LPC(a-22:6)                             | 0.457                      | 0.621                      |
| LPC(a-24:0)                             | 0.104                      | 0.311                      |
| LPC(e-18:1)                             | 0.382                      | 0.443                      |
| LPC(e-24:0)                             | 0.193                      | 0.407                      |
| LPC(e-24:1)                             | 0.525                      | 0.500                      |
| PC(aa-30:0)                             | 0.039                      | 0.300                      |
| PC(aa-30:1)                             | 0.121                      | 0.300                      |
| PC(aa-32:0)                             | 0.254                      | 0.396                      |
| PC(aa-32:1)                             | 0.168                      | 0.039                      |
| PC(aa-32:2)                             | 0.150                      | 0.286                      |
| PC(aa-33:0)                             | 0.339                      | 0.450                      |
| PC(aa-33:2)                             | 0.100                      | 0.532                      |
| PC(aa-34:0)                             | 0.171                      | 0.211                      |
| PC(aa-34:1)                             | 0.182                      | 0.346                      |
| PC(aa-34:2)                             | -0.036                     | 0.339                      |
| PC(aa-34:3)                             | -0.011                     | 0.282                      |
| PC(aa-34:4)                             | 0.175                      | 0.446                      |
| PC(aa-34:5)                             | 0.450                      | 0.557                      |
| PC(aa-35:0)                             | 0.579                      | 0.154                      |
| PC(aa-35:1)                             | 0.561                      | 0.468                      |
| PC(aa-35:2)                             | 0.243                      | 0.521                      |
| PC(aa-35:3)                             | 0.300                      | 0.593                      |
| PC(aa-35:4)                             | 0.146                      | 0.257                      |
| PC(aa-35:5)                             | 0.632                      | 0.550                      |
| PC(aa-36:0)                             | 0.207                      | 0.089                      |
| PC(aa-36:1)                             | 0.396                      | 0.454                      |
| PC(aa-36:2)                             | 0.171                      | 0.604                      |
| PC(aa-36:3)                             | -0.036                     | 0.225                      |
| PC(aa-36:4)                             | -0.107                     | 0.432                      |
| PC(aa-36:5)                             | -0.229                     | 0.332                      |
| PC(aa-37:1)                             | 0.371                      | 0.629                      |
| PC(aa-37:2)                             | 0.282                      | 0.596                      |
| PC(aa-38:1)                             | 0.379                      | 0.350                      |
| PC(aa-38:2)                             | 0.214                      | 0.375                      |
| PC(aa-38:3)                             | 0.289                      | 0.143                      |
| PC(aa-38:4)                             | 0.607                      | 0.321                      |
| PC(aa-38:5)                             | 0.561                      | 0.368                      |
| PC(aa-38:6)                             | 0.586                      | 0.389                      |
| PC(aa-38:7)                             | 0.525                      | 0.350                      |
| PC(aa-39:4)                             | 0.529                      | 0.168                      |
| PC(aa-39:5)                             | 0.425                      | 0.325                      |
| PC(aa-39:6)                             | 0.704                      | 0.282                      |
| PC(aa-40:4)                             | 0.164                      | 0.061                      |
| PC(aa-40:6)                             | 0.429                      | 0.650                      |

Table S5 iii. Spearman's rank correlation coefficient between percent change from week 0 on %FMD (fasting) and percent change fr

| Spearman's Rank Correlation Coefficient | 2 g group                  | 4 g group                  |
|-----------------------------------------|----------------------------|----------------------------|
|                                         | N = 18                     | N = 19                     |
|                                         | %FMD (fasting)<br>(week 8) | %FMD (fasting)<br>(week 8) |
| PC(aa-40:7)                             | 0.579                      | 0.457                      |
| PC(aa-42:5)                             | 0.175                      | 0.529                      |
| PC(aa-42:8)                             | -0.479                     | 0.043                      |
| PC(aa-44:7)                             | 0.404                      | 0.436                      |
| PC(aa-44:8)                             | 0.211                      | 0.311                      |
| PC(aa-44:9)                             | -0.050                     | -0.196                     |
| PC(ae-32:0)                             | 0.396                      | 0.461                      |
| PC(ae-32:1)                             | 0.189                      | 0.514                      |
| PC(ae-34:0)                             | 0.125                      | 0.143                      |
| PC(ae-34:5)                             | -0.064                     | 0.143                      |
| PC(ae-36:1)                             | 0.321                      | 0.396                      |
| PC(ae-36:2)                             | 0.250                      | 0.400                      |
| PC(ae-36:3)                             | 0.189                      | 0.311                      |
| PC(ae-36:4)                             | 0.343                      | 0.139                      |
| PC(ae-36:5)                             | 0.500                      | 0.507                      |
| PC(ae-36:6)                             | -0.021                     | 0.000                      |
| PC(ae-38:2)                             | 0.114                      | 0.225                      |
| PC(ae-38:3)                             | 0.125                      | 0.225                      |
| PC(ae-38:4)                             | 0.096                      | 0.318                      |
| PC(ae-38:6)                             | 0.425                      | 0.468                      |
| PC(ae-40:1)                             | 0.139                      | 0.396                      |
| PC(ae-40:2)                             | 0.089                      | 0.214                      |
| PC(ae-40:5)                             | 0.321                      | 0.704                      |
| PC(ae-40:7)                             | 0.686                      | 0.346                      |
| PC(ae-42:10)                            | 0.543                      | 0.171                      |
| PC(ae-42:2)                             | 0.396                      | 0.532                      |
| PC(ae-42:4)                             | 0.236                      | 0.414                      |
| PC(ae-42:5)                             | 0.439                      | 0.750                      |
| PC(ae-42:6)                             | 0.371                      | 0.461                      |
| PC(ae-42:7)                             | 0.279                      | 0.536                      |
| PC(ae-42:8)                             | 0.239                      | 0.454                      |
| PC(ae-42:9)                             | 0.336                      | 0.036                      |
| PC(ae-44:5)                             | 0.371                      | 0.461                      |
| PC(ae-44:6)                             | 0.350                      | 0.468                      |
| PC(ae-44:7)                             | 0.314                      | 0.532                      |
| PC(ae-44:8)                             | 0.264                      | 0.454                      |
| PC(ae-44:9)                             | 0.146                      | 0.468                      |
| PE(ae-36:3)                             | -0.029                     | 0.139                      |
| PE(ae-38:4)                             | 0.143                      | 0.039                      |
| PE(ae-40:5)                             | -0.231                     | 0.025                      |
| PE(ae-40:6)                             | -0.161                     | 0.254                      |
| PE(ae-40:7)                             | -0.071                     | 0.039                      |
| PE(ae-42:6)                             | -0.161                     | -0.211                     |
| PE(ae-42:7)                             | -0.226                     | 0.125                      |
| PI(aa-38:3)                             | 0.021                      | -0.179                     |
| PI(aa-40:6)                             | 0.207                      | 0.089                      |
| PS(aa-36:1)                             | 0.175                      | 0.207                      |
| PS(aa-36:2)                             | 0.089                      | 0.264                      |
| PS(aa-38:5)                             | 0.361                      | 0.161                      |
| PS(aa-40:4)                             | -0.029                     | -0.020                     |
| PS(aa-40:5)                             | 0.311                      | 0.130                      |
| Phytocer(24:0)                          | -0.107                     | 0.154                      |
| Phytocer(25:0)                          | -0.175                     | 0.032                      |
| Phytocer(26:0)                          | 0.275                      | -0.175                     |
| SM(13:0)                                | 0.364                      | 0.657                      |
| SM(14:0)                                | 0.304                      | 0.550                      |
| SM(14:0-OH)                             | 0.107                      | 0.407                      |
| SM(14:1)                                | 0.364                      | 0.704                      |
| SM(15:0)                                | 0.354                      | 0.682                      |
| SM(15:1)                                | 0.257                      | 0.689                      |
| SM(16:0)                                | 0.150                      | 0.332                      |
| SM(16:0-OH)                             | 0.457                      | 0.329                      |
| SM(17:0)                                | 0.389                      | 0.614                      |
| SM(18:0)                                | 0.593                      | 0.754                      |

Table S5 iii. Spearman's rank correlation coefficient between percent change from week 0 on %FMD (fasting) and percent change fr

|                                         | 2 g group<br>N = 18        | 4 g group<br>N = 19        |
|-----------------------------------------|----------------------------|----------------------------|
| Spearman's Rank Correlation Coefficient | %FMD (fasting)<br>(week 8) | %FMD (fasting)<br>(week 8) |
| SM(18:1)                                | 0.636                      | 0.686                      |
| SM(19:0)                                | 0.289                      | 0.586                      |
| SM(19:1)                                | 0.332                      | 0.155                      |
| SM(20:0)                                | 0.104                      | 0.525                      |
| SM(20:1)                                | 0.246                      | 0.718                      |
| SM(20:2)                                | 0.332                      | 0.489                      |
| SM(21:0)                                | 0.107                      | 0.475                      |
| SM(21:1)                                | 0.275                      | 0.779                      |
| SM(22:0)                                | 0.071                      | 0.325                      |
| SM(22:1)                                | 0.261                      | 0.550                      |
| SM(22:2)                                | 0.429                      | 0.511                      |
| SM(23:0)                                | 0.186                      | 0.514                      |
| SM(23:1)                                | 0.371                      | 0.696                      |
| SM(23:2)                                | 0.554                      | 0.757                      |
| SM(24:0)                                | 0.150                      | 0.304                      |
| SM(24:0-OH)                             | 0.336                      | 0.164                      |
| SM(24:1)                                | 0.450                      | 0.586                      |
| SM(24:1-OH)                             | 0.564                      | 0.639                      |
| SM(24:2)                                | 0.514                      | 0.704                      |
| SM(24:3)                                | 0.521                      | 0.607                      |
| SM(25:0)                                | 0.154                      | 0.475                      |
| SM(25:1)                                | 0.432                      | 0.600                      |
| SM(25:2)                                | 0.400                      | 0.707                      |
| SM(26:0)                                | 0.064                      | 0.318                      |
| SM(26:1)                                | 0.436                      | 0.571                      |
| TG(aaa-49:1)                            | 0.146                      | -0.004                     |
| TG(aaa-49:2)                            | 0.186                      | 0.129                      |
| TG(aaa-54:0)                            | -0.207                     | -0.368                     |
| TG(aaa-56:0)                            | -0.175                     | -0.518                     |
